# Supplementary material for: A Proposal for a Consolidated Structural Model of the CagY Protein of Helicobacter pylori
Source: MDPI journal article supplement (doi:10.3390/ijms242316781), 2023-11-26
Supplement: s1 [file s1]

## Supplementary Tables

**Table S1.- STRING network of CagY protein.**

| #node 1 | node2   | node1 string_id | node2 string_id | Neighborhood on chromosome | Gene fusion | Phylogenetic cooccurrence | homology | coexpression | Experimentally determined interaction | databaseannotated | Automated textmining | Combined score |
|---------|---------|-----------------|-----------------|----------------------------|-------------|---------------------------|----------|--------------|---------------------------------------|-------------------|----------------------|----------------|
| HP_0017 | HP_0039 | 85962.HP_0017   | 85962.HP_0039   | 0.043                      | 0           | 0                         | 0        | 0.449        | 0                                     | 0.141             | 0                    | 0.507          |
| HP_0017 | HP_0530 | 85962.HP_0017   | 85962.HP_0530   | 0                          | 0           | 0                         | 0        | 0.405        | 0.318                                 | 0                 | 0                    | 0.577          |
| HP_0017 | HP_0528 | 85962.HP_0017   | 85962.HP_0528   | 0                          | 0           | 0.325                     | 0        | 0.449        | 0                                     | 0.141             | 0                    | 0.652          |
| HP_0017 | HP_0524 | 85962.HP_0017   | 85962.HP_0524   | 0                          | 0           | 0.775                     | 0        | 0.053        | 0                                     | 0                 | 0.041                | 0.777          |
| HP_0017 | HP_0525 | 85962.HP_0017   | 85962.HP_0525   | 0                          | 0           | 0.724                     | 0        | 0.346        | 0                                     | 0                 | 0.041                | 0.811          |
| HP_0017 | HP_0040 | 85962.HP_0017   | 85962.HP_0040   | 0.043                      | 0           | 0.774                     | 0        | 0.449        | 0                                     | 0.141             | 0                    | 0.883          |
| HP_0017 | HP_0527 | 85962.HP_0017   | 85962.HP_0527   | 0.084                      | 0           | 0.775                     | 0        | 0.597        | 0                                     | 0.167             | 0.092                | 0.925          |
| HP_0039 | HP_0530 | 85962.HP_0039   | 85962.HP_0530   | 0                          | 0           | 0                         | 0        | 0.472        | 0                                     | 0                 | 0                    | 0.472          |
| HP_0039 | HP_0525 | 85962.HP_0039   | 85962.HP_0525   | 0.042                      | 0           | 0                         | 0        | 0.476        | 0                                     | 0                 | 0.045                | 0.478          |
| HP_0039 | HP_0459 | 85962.HP_0039   | 85962.HP_0459   | 0.043                      | 0           | 0                         | 0        | 0.449        | 0                                     | 0.141             | 0                    | 0.507          |
| HP_0039 | cagE    | 85962.HP_0039   | 85962.HP_0544   | 0.043                      | 0           | 0                         | 0        | 0.449        | 0                                     | 0.141             | 0                    | 0.507          |
| HP_0039 | HP_0040 | 85962.HP_0039   | 85962.HP_0040   | 0.773                      | 0.862       | 0                         | 0        | 0            | 0                                     | 0                 | 0                    | 0.967          |
| HP_0039 | HP_0527 | 85962.HP_0039   | 85962.HP_0527   | 0.063                      | 0           | 0                         | 0        | 0.642        | 0.895                                 | 0.182             | 0.096                | 0.969          |
| HP_0040 | HP_0530 | 85962.HP_0040   | 85962.HP_0530   | 0                          | 0           | 0                         | 0        | 0.472        | 0                                     | 0                 | 0                    | 0.472          |
| HP_0040 | HP_0525 | 85962.HP_0040   | 85962.HP_0525   | 0.042                      | 0           | 0.518                     | 0        | 0.476        | 0                                     | 0                 | 0.045                | 0.738          |
| HP_0040 | HP_0524 | 85962.HP_0040   | 85962.HP_0524   | 0.047                      | 0           | 0.768                     | 0        | 0            | 0                                     | 0                 | 0.045                | 0.77           |
| HP_0040 | cagE    | 85962.HP_0040   | 85962.HP_0544   | 0.043                      | 0           | 0.765                     | 0        | 0.449        | 0                                     | 0.141             | 0                    | 0.879          |
| HP_0040 | HP_0459 | 85962.HP_0040   | 85962.HP_0459   | 0.043                      | 0           | 0.775                     | 0        | 0.449        | 0                                     | 0.141             | 0                    | 0.884          |

|             |             |                   |                   |       |       |       |   |       |       |       |       |       |
|-------------|-------------|-------------------|-------------------|-------|-------|-------|---|-------|-------|-------|-------|-------|
| HP_00<br>40 | HP_05<br>27 | 85962.HP_<br>0040 | 85962.HP_<br>0527 | 0.063 | 0     | 0.761 | 0 | 0.642 | 0.895 | 0.182 | 0.096 | 0.992 |
| HP_04<br>59 | HP_05<br>30 | 85962.HP_<br>0459 | 85962.HP_<br>0530 | 0     | 0     | 0     | 0 | 0.405 | 0.318 | 0     | 0     | 0.576 |
| HP_04<br>59 | HP_05<br>28 | 85962.HP_<br>0459 | 85962.HP_<br>0528 | 0     | 0     | 0.362 | 0 | 0.449 | 0     | 0.141 | 0     | 0.671 |
| HP_04<br>59 | HP_05<br>24 | 85962.HP_<br>0459 | 85962.HP_<br>0524 | 0     | 0     | 0.775 | 0 | 0.053 | 0     | 0     | 0.041 | 0.777 |
| HP_04<br>59 | HP_05<br>25 | 85962.HP_<br>0459 | 85962.HP_<br>0525 | 0     | 0.001 | 0.728 | 0 | 0.346 | 0     | 0     | 0.041 | 0.814 |
| HP_04<br>59 | HP_05<br>27 | 85962.HP_<br>0459 | 85962.HP_<br>0527 | 0.084 | 0     | 0.775 | 0 | 0.596 | 0     | 0.167 | 0.276 | 0.94  |
| HP_05<br>24 | cagT        | 85962.HP_<br>0524 | 85962.HP_<br>0532 | 0.352 | 0     | 0     | 0 | 0.046 | 0     | 0     | 0.563 | 0.706 |
| HP_05<br>24 | HP_05<br>30 | 85962.HP_<br>0524 | 85962.HP_<br>0530 | 0.387 | 0     | 0     | 0 | 0     | 0     | 0     | 0.586 | 0.735 |
| HP_05<br>24 | cagE        | 85962.HP_<br>0524 | 85962.HP_<br>0544 | 0     | 0.058 | 0.775 | 0 | 0.053 | 0     | 0     | 0.508 | 0.888 |
| HP_05<br>24 | HP_05<br>28 | 85962.HP_<br>0524 | 85962.HP_<br>0528 | 0.568 | 0     | 0.388 | 0 | 0     | 0     | 0     | 0.636 | 0.895 |
| HP_05<br>24 | HP_05<br>25 | 85962.HP_<br>0524 | 85962.HP_<br>0525 | 0.774 | 0.161 | 0.727 | 0 | 0     | 0     | 0     | 0.541 | 0.973 |
| HP_05<br>24 | HP_05<br>27 | 85962.HP_<br>0524 | 85962.HP_<br>0527 | 0.604 | 0     | 0.775 | 0 | 0     | 0.282 | 0     | 0.631 | 0.973 |
| HP_05<br>25 | cagT        | 85962.HP_<br>0525 | 85962.HP_<br>0532 | 0.216 | 0     | 0     | 0 | 0     | 0     | 0     | 0.507 | 0.597 |
| HP_05<br>25 | HP_05<br>30 | 85962.HP_<br>0525 | 85962.HP_<br>0530 | 0.387 | 0     | 0     | 0 | 0.363 | 0     | 0     | 0.611 | 0.835 |
| HP_05<br>25 | HP_05<br>28 | 85962.HP_<br>0525 | 85962.HP_<br>0528 | 0.472 | 0     | 0.229 | 0 | 0.476 | 0     | 0     | 0.639 | 0.913 |
| HP_05<br>25 | cagE        | 85962.HP_<br>0525 | 85962.HP_<br>0544 | 0     | 0.222 | 0.751 | 0 | 0.346 | 0     | 0     | 0.461 | 0.922 |
| HP_05<br>25 | HP_05<br>27 | 85962.HP_<br>0525 | 85962.HP_<br>0527 | 0.505 | 0     | 0.731 | 0 | 0.495 | 0     | 0     | 0.625 | 0.971 |
| HP_05<br>27 | HP_05<br>30 | 85962.HP_<br>0527 | 85962.HP_<br>0530 | 0.594 | 0     | 0     | 0 | 0.609 | 0     | 0     | 0.61  | 0.933 |
| HP_05<br>27 | cagE        | 85962.HP_<br>0527 | 85962.HP_<br>0544 | 0.084 | 0     | 0.775 | 0 | 0.596 | 0     | 0.167 | 0.558 | 0.963 |
| HP_05<br>27 | cagT        | 85962.HP_<br>0527 | 85962.HP_<br>0532 | 0.289 | 0     | 0     | 0 | 0.044 | 0.8   | 0     | 0.767 | 0.964 |
| HP_05<br>27 | HP_05<br>28 | 85962.HP_<br>0527 | 85962.HP_<br>0528 | 0.751 | 0     | 0.671 | 0 | 0.642 | 0.978 | 0.182 | 0.814 | 0.999 |
| HP_05<br>28 | cagE        | 85962.HP_<br>0528 | 85962.HP_<br>0544 | 0     | 0     | 0.502 | 0 | 0.449 | 0     | 0.141 | 0.534 | 0.875 |
| HP_05<br>28 | HP_05<br>30 | 85962.HP_<br>0528 | 85962.HP_<br>0530 | 0.613 | 0     | 0     | 0 | 0.472 | 0     | 0     | 0.591 | 0.909 |

|             |      |                   |                   |       |   |   |   |       |       |   |       |       |
|-------------|------|-------------------|-------------------|-------|---|---|---|-------|-------|---|-------|-------|
| HP_05<br>28 | cagT | 85962.HP_<br>0528 | 85962.HP_<br>0532 | 0.447 | 0 | 0 | 0 | 0     | 0.8   | 0 | 0.638 | 0.956 |
| HP_05<br>30 | cagT | 85962.HP_<br>0530 | 85962.HP_<br>0532 | 0.285 | 0 | 0 | 0 | 0     | 0     | 0 | 0.526 | 0.646 |
| HP_05<br>30 | cagE | 85962.HP_<br>0530 | 85962.HP_<br>0544 | 0     | 0 | 0 | 0 | 0.405 | 0.318 | 0 | 0.439 | 0.752 |
| cagE        | cagT | 85962.HP_<br>0544 | 85962.HP_<br>0532 | 0     | 0 | 0 | 0 | 0.192 | 0     | 0 | 0.726 | 0.769 |

**Table S2.- Protein Interactions of CagY/Cag7 calculated by STRING server.**

| #term ID | term description                                                                            | observed gene count | background gene count | string length | false discovery rate | matching proteins in your network (IDs)                                                                                                                   | matching proteins in your network (labels)                                        |
|----------|---------------------------------------------------------------------------------------------|---------------------|-----------------------|---------------|----------------------|-----------------------------------------------------------------------------------------------------------------------------------------------------------|-----------------------------------------------------------------------------------|
| 28       | CL: Mixed, incl. Bacterial secretion system, and Type IV secretion system, VirB10/TrbI      | 11                  | 35                    | 5             | 1.6 1.33E-15         | 85962.HP_0017,85962.HP_0039,85962.HP_0040,85962.HP_0459,85962.HP_0524,85962.HP_0525,85962.HP_0527,85962.HP_0528,85962.HP_0530,85962.HP_0532,85962.HP_0544 | HP_0017,HP_0039,HP_0040,HP_0459,HP_0524,HP_0525,HP_0527,HP_0528,HP_0530,cagT,cagE |
| 28       | CL: Bacterial secretion system, and Type IV secretion system, VirB10/TrbI                   | 10                  | 19                    | 7             | 1.8 1.55E-15         | 85962.HP_0017,85962.HP_0039,85962.HP_0040,85962.HP_0524,85962.HP_0525,85962.HP_0527,85962.HP_0528,85962.HP_0530,85962.HP_0532,85962.HP_0544               | HP_0017,HP_0039,HP_0040,HP_0524,HP_0525,HP_0527,HP_0528,HP_0530,cagT,cagE         |
| 28       | CL: Bacterial secretion system, and Type IV secretion system, VirB10/TrbI                   | 7                   | 10                    | 2             | 8.00E-11             | 85962.HP_0524,85962.HP_0525,85962.HP_0527,85962.HP_0528,85962.HP_0530,85962.HP_0532,85962.HP_0544                                                         | HP_0524,HP_0525,HP_0527,HP_0528,HP_0530,cagT,cagE                                 |
| 28       | CL: Mixed, incl. Protein-exporting ATPase activity, and Type II/IV secretion system protein | 4                   | 5                     | 6             | 2.0 8.25E-06         | 85962.HP_0524,85962.HP_0525,85962.HP_0530,85962.HP_0544                                                                                                   | HP_0524,HP_0525,HP_0530,cagE                                                      |
| 28       | CL: Mixed, incl. Conjugal transfer protein, and Type IV secretion system, VirB10/TrbI       | 3                   | 5                     | 3             | 1.9 0.0006           | 85962.HP_0527,85962.HP_0528,85962.HP_0532                                                                                                                 | HP_0527,HP_0528,cagT                                                              |
| 28       | CL: Mixed, incl. Conjugal transfer protein, and Helicase HerA, central domain               | 3                   | 5                     | 3             | 1.9 0.0006           | 85962.HP_0017,85962.HP_0039,85962.HP_0040                                                                                                                 | HP_0017,HP_0039,HP_0040                                                           |

**Table S3.- Protein Templates used by the I-TASSER server to model the MRR of CagY.**

| PDB Hit | PDB accesion | RMSD  | Protein name                                                                                                                                                                    |
|---------|--------------|-------|---------------------------------------------------------------------------------------------------------------------------------------------------------------------------------|
| 1       | 7kogB        | 0.675 | Lethocerus Myosin II complete coiled-coil domain resolved in its native environment                                                                                             |
| 2       | 3hr2A        | 0.256 | Low resolution, molecular envelope structure of type I collagen in situ determined by fiber diffraction. Single type I collagen molecule, post rigid body refinement, 'relaxed' |
| 3       | 1c1gA        | 0.193 | CRYSTAL STRUCTURE OF TROPOMYOSIN AT 7 ANGSTROMS RESOLUTION IN THE SPERMINE-INDUCED CRYSTAL FORM                                                                                 |
| 4       | 6yvuB        | 0.171 | Condensin complex from S.cerevisiae ATP-free apo non-engaged state                                                                                                              |
| 5       | 6f1tX        | 0.168 | Cryo-EM structure of two dynein tail domains bound to dynactin and BICDR1                                                                                                       |
| 6       | 6z9lA        | 0.163 | Enterococcal PrgA                                                                                                                                                               |
| 7       | 1sjjA        | 0.161 | Cryo-EM Structure of Chicken Gizzard Smooth Muscle alpha-Actinin                                                                                                                |
| 8       | 6jlbA        | 0.158 | Crystal structure of lamin A/C fragment and assembly mechanisms of intermediate filaments                                                                                       |
| 9       | 6l5jA        | 0.155 | Crystal structure of human rootletin 1108-1317                                                                                                                                  |

**Table S4.- Predicted disulfide bonds by PDBsum.**

| 1st cysteine | 2nd cysteine | Type (*) | Chi1   | Chi2  | Chi3  | Chi2p | Chi1p |
|--------------|--------------|----------|--------|-------|-------|-------|-------|
| A 92         | A 102        | LHS      | -179.7 | -88.4 | -73.6 | -53.6 | -64.9 |
| A 125        | A 138        | LHS      | -177.3 | -65.0 | -77.7 | -66.9 | -64.7 |
| A 163        | A 176        | LHS      | -178.5 | -61.7 | -65.8 | -67.2 | -65.6 |
| A 205        | A 218        | LHS      | -176.6 | -67.7 | -78.3 | -62.3 | -61.1 |
| A 237        | A 250        | LHS      | -177.0 | -67.7 | -73.0 | -60.8 | -63.2 |
| A 274        | A 287        | LHS      | -179.3 | -79.1 | -71.6 | -67.7 | -61.9 |
| A 306        | A 319        | LHS      | -178.0 | -71.8 | -68.0 | -85.2 | -61.7 |
| A 343        | A 356        | LHS      | -179.6 | -76.7 | -69.1 | -71.9 | -65.4 |
| A 382        | A 395        | LHS      | 179.1  | -75.8 | -73.5 | -63.5 | -63.7 |
| A 420        | A 433        | LHS      | -179.4 | -85.1 | -64.9 | -78.1 | -63.2 |
| A 452        | A 465        | LHS      | -176.6 | -79.1 | -62.5 | -79.9 | -61.0 |
| A 489        | A 502        | LHS      | 179.8  | -78.8 | -72.3 | -63.8 | -63.1 |
| A 527        | A 540        | LHS      | -178.6 | -65.4 | -73.7 | -71.1 | -63.5 |
| A 566        | A 579        | LHS      | -179.9 | -76.8 | -76.5 | -55.8 | -62.3 |
| A 604        | A 617        | LHS      | -179.0 | -74.9 | -71.5 | -67.5 | -62.8 |
| A 636        | A 649        | LHS      | -177.4 | -70.3 | -69.2 | -77.4 | -61.7 |
| A 673        | A 686        | LHS      | -178.5 | -64.1 | -73.7 | -71.6 | -62.9 |
| A 711        | A 724        | LHS      | 179.9  | -76.8 | -72.5 | -64.7 | -62.9 |
| A 749        | A 762        | LHS      | -178.9 | -72.8 | -71.2 | -77.2 | -61.6 |
| A 781        | A 794        | LHS      | -178.3 | -83.7 | -61.3 | -88.6 | -62.7 |
| A 818        | A 831        | LHS      | -179.9 | -80.4 | -66.3 | -77.8 | -63.7 |
| A 856        | A 869        | LHS      | -177.8 | -78.5 | -71.6 | -61.9 | -62.8 |
| A 895        | A 908        | LHS      | -177.8 | -81.1 | -63.3 | -81.3 | -63.2 |
| A 927        | A 940        | LHS      | -177.9 | -75.0 | -63.7 | -91.0 | -63.9 |
| A 964        | A 977        | LHS      | -178.5 | -66.0 | -75.7 | -74.1 | -62.3 |
| A 1003       | A 1016       | LHS      | -179.5 | -76.8 | -75.1 | -59.6 | -63.6 |
| A 1042       | A 1057       | LHS      | -174.6 | -87.2 | -59.0 | -79.0 | -63.3 |
| A 1081       | A 1094       | LHS      | -175.2 | -84.9 | -53.6 | -78.8 | -66.7 |

(\*) The data displayed for each disulphide bond is as follows: The table shows the residue numbers of the two cysteines involved in the disulphide bridge and the type of disulphide. The type of bridge is abbreviated (RHH: right hand hook; SRH: short right hand hook; LHS: left handed spiral; RHS: right handed spiral). Chi1, chi2, chi3, chi2' and chi1' values and the distance between the C-alpha atoms of the residues involved are also recorded.

**Table S5.- AP sequences**

| AP model | Sequence                                              |
|----------|-------------------------------------------------------|
| WT       | FLQTAPIIALDKLIGLGKGRSERTPEFNYPALGQAINGSMQSSAQMSNQILGQ |
| GS20     | FLQTAPIIALDKLIGSGSGSGSGSGSGSGSGSGSMQSSAQMSNQILGQ      |
| Xc (*)   | FLQTAPIIALDKLIGVSGGIVTQQPFESNTSMQSSAQMSNQILGQ         |

**(\*) *Xanthomonas citri***
